# Supplementary material
Source: publisher site journal article supplement (https://www.dovepress.com/get_supplementary_file.php?f=425858.xlsx)
Supplement: Supplementary file 1 [file get_supplementary_file.php]

## Sheet: Sens & speci b4 coding
	Micormedix	ChatGPT3.5	ChatGPT4	BingAI	Bard experiment	Drugs.com
1 empagliflozin_atorvastatin	1	3	1	1	3	1		7= ‎'not being able to classify‎, 1= no drug interactions, 2= minor, 3=moderate, 4= major/contraindicated
2 empagliflozin_Levothyroxine	1	3	1	3	3	3
3 empagliflozin_Metformin	1	3	1	3	1	1
4 empagliflozin_Lisinopril	3	3	1	3	3	3
5 empagliflozin_Amlodipine	1	3	1	3	3	3
6 empagliflozin_Metoprolol	3	3	1	3	3	3
7 empagliflozin_Albuterol	1	1	1	3	3	3
8 empagliflozin_Omeprazole	1	3	1	1	1	1
9 empagliflozin_Losartan	1	3	1	3	3	3
10 empagliflozin_Gabapentin	1	3	1	1	1	1
11 empagliflozin_Hydrochlorothiazide	3	3	1	3	3	3
12 empagliflozin_Sertraline	1	3	1	3	1	1
13 empagliflozin_Simvastatin	1	3	1	1	1	1
14 empagliflozin_Montelukast	1	1	1	1	1	1
15 empagliflozin_Escitalopram	1	3	1	7	1	1
16 empagliflozin_Acetaminophen	1	1	1	1	1	1
17 empagliflozin_Hydrocodone	1	3	1	1	1	1
18 empagliflozin_Rosuvastatin	1	3	1	1	1	1
19 empagliflozin_Bupropion	1	3	1	1	2	1
20 empagliflozin_Furosemide	3	3	3	3	4	3
21 empagliflozin_Pantoprazole	1	2	1	1	1	1
22 empagliflozin_Trazodone	1	3	3	7	3	1
24 empagliflozin_Amphetamine	1	3	1	7	1	1
25 empagliflozin_Fluticasone	1	3	1	7	3	1
26 empagliflozin_Tamsulosin	1	3	1	3	3	3
27 empagliflozin_Fluoxetine	1	3	3	1	3	1
28 empagliflozin_Carvedilol	3	3	3	3	3	3
29 empagliflozin_Duloxetine	1	3	3	7	3	1
30 empagliflozin_Meloxicam	1	3	1	3	3	1
31 empagliflozin_Clopidogrel	1	3	1	1	3	1
32 empagliflozin_Prednisone	1	3	3	3	3	3
33 empagliflozin_Citalopram	1	3	3	3	3	1
34 empagliflozin_Insulin Glargine	3	1	3	3	3	3
35 empagliflozin_Potassium Chloride	1	3	1	1	3	1
36 empagliflozin_Pravastatin	1	2	1	7	1	1
37 empagliflozin_Tramadol	1	3	3	7	1	1
38 empagliflozin_Aspirin	1	1	1	1	1	1
39 empagliflozin_Alprazolam	1	3	3	7	1	1
40 empagliflozin_Ibuprofen	1	3	3	1	3	1
41 empagliflozin_Cyclobenzaprine	1	3	3	7	1	1
42 empagliflozin_Amoxicillin	1	1	1	1	1	1
43 empagliflozin_Methylphenidate	1	1	1	7	1	1
44 empagliflozin_Allopurinol	1	4	1	1	1	1
45 empagliflozin_Venlafaxine	1	3	3	7	1	1
46 empagliflozin_Clonazepam	1	1	1	7	1	1
47 empagliflozin_Ethinyl Estradiol	1	2	1	1	1	3
48 empagliflozin_ Norethindrone	1	2	1	7	7	3
49 empagliflozin_Ergocalciferol	1	2	1	1	1	1
50 empagliflozin_Zolpidem	1	2	1	7	1	1
51 empagliflozin_Apixaban	1	3	1	1	1	1
52 empagliflozin_Glipizide	3	3	3	3	3	3
1 dapagliflozin_atorvastatin	1	3	1	1	1	1
2 dapagliflozin_Levothyroxine	1	1	1	3	3	3
3 dapagliflozin_Metformin	1	1	2	3	1	1
4 dapagliflozin_Lisinopril	3	3	3	3	3	3
5 dapagliflozin_Amlodipine	1	2	1	3	3	3
6 dapagliflozin_Metoprolol	3	1	3	3	3	3
7 dapagliflozin_Albuterol	1	1	1	3	7	1
8 dapagliflozin_Omeprazole	1	1	1	1	1	1
9 dapagliflozin_Losartan	1	2	3	3	4	3
10 dapagliflozin_Gabapentin	1	2	1	1	1	1
11 dapagliflozin_Hydrochlorothiazide	3	3	3	3	3	3
12 dapagliflozin_Sertraline	1	1	3	3	1	1
13 dapagliflozin_Simvastatin	1	3	1	2	1	2
14 dapagliflozin_Montelukast	1	2	1	1	3	1
15 dapagliflozin_Escitalopram	1	3	3	7	1	1
16 dapagliflozin_Acetaminophen	1	1	1	1	2	1
17 dapagliflozin_Hydrocodone	1	7	3	7	1	1
18 dapagliflozin_Rosuvastatin	1	3	1	1	1	1
19 dapagliflozin_Bupropion	1	3	3	1	3	1
20 dapagliflozin_Furosemide	3	3	3	3	3	3
21 dapagliflozin_Pantoprazole	1	1	1	1	1	1
22 dapagliflozin_Trazodone	1	2	3	7	1	1
24 dapagliflozin_Amphetamine	1	3	3	3	1	1
25 dapagliflozin_Fluticasone	1	3	1	7	3	1
26 dapagliflozin_Tamsulosin	1	2	3	3	3	3
27 dapagliflozin_Fluoxetine	1	3	3	7	3	1
28 dapagliflozin_Carvedilol	3	3	3	3	3	3
29 dapagliflozin_Duloxetine	1	3	3	7	3	1
30 dapagliflozin_Meloxicam	1	3	3	7	1	1
31 dapagliflozin_Clopidogrel	1	1	3	1	3	1
32 dapagliflozin_Prednisone	1	3	3	3	3	3
33 dapagliflozin_Citalopram	1	3	3	1	3	1
34 dapagliflozin_Insulin Glargine	3	2	3	3	3	3
35 dapagliflozin_Potassium Chloride	1	2	3	1	3	1
36 dapagliflozin_Pravastatin	1	2	1	1	7	1
37 dapagliflozin_Tramadol	1	3	3	7	3	1
38 dapagliflozin_Aspirin	1	1	1	1	1	1
39 dapagliflozin_Alprazolam	1	1	3	7	1	1
40 dapagliflozin_Ibuprofen	1	3	3	1	3	1
41 dapagliflozin_Cyclobenzaprine	1	1	1	7	1	1
42 dapagliflozin_Amoxicillin	1	1	1	3	1	1
43 dapagliflozin_Methylphenidate	1	3	1	1	3	1
44 dapagliflozin_Allopurinol	1	3	3	7	1	1
45 dapagliflozin_Venlafaxine	1	1	3	7	3	1
46 dapagliflozin_Clonazepam	1	2	1	7	1	1
47 dapagliflozin_Ethinyl Estradiol	1	3	1	3	3	3
48 dapagliflozin_ Norethindrone	1	3	1	7	3	3
49 dapagliflozin_Ergocalciferol	1	1	1	7	1	1
50 dapagliflozin_Zolpidem	1	1	3	1	1	1
51 dapagliflozin_Apixaban	1	3	1	1	1	1
52 dapagliflozin_Glipizide	1	3	3	3	3	3
1 canagliflozin_atorvastatin	1	3	1	7	3	1
2 canagliflozin_Levothyroxine	1	3	1	3	3	3
3 canagliflozin_Metformin	1	3	3	3	1	1
4 canagliflozin_Lisinopril	3	3	3	3	3	3
5 canagliflozin_Amlodipine	1	3	3	3	3	3
6 canagliflozin_Metoprolol	3	3	3	3	3	3
7 canagliflozin_Albuterol	1	2	1	1	1	1
8 canagliflozin_Omeprazole	1	1	1	1	3	1
9 canagliflozin_Losartan	1	3	3	3	3	3
10 canagliflozin_Gabapentin	1	2	3	1	3	1
11 canagliflozin_Hydrochlorothiazide	3	3	3	1	1	3
12 canagliflozin_Sertraline	1	3	3	3	2	1
13 canagliflozin_Simvastatin	1	3	3	1	2	1
14 canagliflozin_Montelukast	1	1	1	1	1	1
15 canagliflozin_Escitalopram	1	3	3	7	1	1
16 canagliflozin_Acetaminophen	1	2	1	1	1	1
17 canagliflozin_Hydrocodone	1	3	3	7	3	1
18 canagliflozin_Rosuvastatin	1	3	1	3	3	1
19 canagliflozin_Bupropion	1	3	3	7	1	1
20 canagliflozin_Furosemide	3	3	3	3	3	3
21 canagliflozin_Pantoprazole	1	2	1	7	1	1
22 canagliflozin_Trazodone	1	3	3	2	3	1
24 canagliflozin_Amphetamine	1	3	3	1	1	1
25 canagliflozin_Fluticasone	1	3	1	1	3	1
26 canagliflozin_Tamsulosin	1	3	3	7	3	3
27 canagliflozin_Fluoxetine	1	3	3	3	3	1
28 canagliflozin_Carvedilol	3	3	3	3	3	3
29 canagliflozin_Duloxetine	1	3	3	1	3	1
30 canagliflozin_Meloxicam	1	3	3	7	3	1
31 canagliflozin_Clopidogrel	1	3	3	7	3	1
32 canagliflozin_Prednisone	1	2	3	7	3	3
33 canagliflozin_Citalopram	1	3	3	3	3	1
34 canagliflozin_Insulin Glargine	3	3	3	3	4	3
35 canagliflozin_Potassium Chloride	1	3	3	1	3	1
36 canagliflozin_Pravastatin	1	3	1	7	1	1
37 canagliflozin_Tramadol	1	3	3	7	3	1
38 canagliflozin_Aspirin	1	3	3	1	1	1
39 canagliflozin_Alprazolam	1	1	3	7	3	1
40 canagliflozin_Ibuprofen	1	3	3	1	3	1
41 canagliflozin_Cyclobenzaprine	1	3	3	1	1	1
42 canagliflozin_Amoxicillin	1	2	1	7	1	1
43 canagliflozin_Methylphenidate	1	3	3	1	1	1
44 canagliflozin_Allopurinol	1	3	3	1	3	1
45 canagliflozin_Venlafaxine	1	3	3	7	1	1
46 canagliflozin_Clonazepam	1	3	3	7	1	1
47 canagliflozin_Ethinyl Estradiol	1	3	3	3	2	3
48 canagliflozin_ Norethindrone	1	3	1	3	7	3
49 canagliflozin_Ergocalciferol	1	1	1	7	1	1
50 canagliflozin_Zolpidem	1	1	3	1	3	1
51 canagliflozin_Apixaban	1	3	3	7	3	1
52 canagliflozin_Glipizide	1	3	3	1	3	3
1 clarithro_atorvastatin	4	4	4	4	5	4
2 clarithromycin_Levothyroxine	1	3	1	1	1	1
3 clarithromycin_Metformin	1	4	3	3	3	3
4 clarithromycin_Lisinopril	1	3	1	7	3	1
5 clarithromycin_Amlodipine	4	4	3	3	3	3
6 clarithromycin_Metoprolol	1	4	3	7	7	1
7 clarithromycin_Albuterol	1	3	1	3	3	3
8 clarithromycin_Omeprazole	1	3	3	2	2	2
9 clarithromycin_Losartan	4	3	3	7	3	1
10 clarithromycin_Gabapentin	1	3	1	1	1	1
11 clarithromycin_Hydrochlorothiazide	1	3	1	1	3	1
12 clarithromycin_Sertraline	4	4	3	3	7	3
13 clarithromycin_Simvastatin	5	4	4	4	5	4
14 clarithromycin_Montelukast	1	3	3	2	3	1
15 clarithromycin_Escitalopram	4	3	4	4	5	4
16 clarithromycin_Acetaminophen	1	2	1	1	1	1
17 clarithromycin_Hydrocodone	1	4	3	4	7	4
18 clarithromycin_Rosuvastatin	1	4	3	2	3	1
19 clarithromycin_Bupropion	4	3	3	7	3	1
20 clarithromycin_Furosemide	1	4	3	7	3	1
21 clarithromycin_Pantoprazole	1	4	3	3	3	1
22 clarithromycin_Trazodone	4	4	4	3	7	3
24 clarithromycin_Amphetamine	1	3	3	7	3	1
25 clarithromycin_Fluticasone	4	3	3	3	3	4
26 clarithromycin_Tamsulosin	4	3	3	4	5	4
27 clarithromycin_Fluoxetine	4	4	3	3	4	3
28 clarithromycin_Carvedilol	1	4	3	3	4	1
29 clarithromycin_Duloxetine	1	3	3	1	1	1
30 clarithromycin_Meloxicam	1	3	3	7	3	1
31 clarithromycin_Clopidogrel	1	3	4	4	4	3
32 clarithromycin_Prednisone	3	4	3	3	3	3
33 clarithromycin_Citalopram	4	4	3	4	7	4
34 clarithromycin_Insulin Glargine	1	3	1	3	4	3
35 clarithromycin_Potassium Chloride	1	3	1	7	1	1
36 clarithromycin_Pravastatin	3	3	3	3	3	3
37 clarithromycin_Tramadol	4	4	3	3	4	3
38 clarithromycin_Aspirin	1	3	3	1	1	1
39 clarithromycin_Alprazolam	5	4	3	4	5	4
40 clarithromycin_Ibuprofen	1	3	1	1	1	1
41 clarithromycin_Cyclobenzaprine	4	3	3	7	3	1
42 clarithromycin_Amoxicillin	1	3	1	2	2	2
43 clarithromycin_Methylphenidate	1	4	3	7	3	1
44 clarithromycin_Allopurinol	1	3	3	7	3	1
45 clarithromycin_Venlafaxine	4	3	3	4	7	3
46 clarithromycin_Clonazepam	4	3	3	3	3	3
47 clarithromycin_Ethinyl Estradiol	1	3	3	3	3	3
48 clarithromycin_ Norethindrone	1	4	3	4	3	3
49 clarithromycin_Ergocalciferol	1	3	1	1	1	1
50 clarithromycin_Zolpidem	4	4	3	2	3	3
51 clarithromycin_Apixaban	1	3	4	3	3	3
52 clarithromycin_Glipizide	3	4	3	3	4	3
1 azithromycin_atorvastatin	3	3	3	3	3	3
2 azithromycin_Levothyroxine	1	3	1	1	1	1
3 azithromycin_Metformin	1	2	1	3	2	1
4 azithromycin_Lisinopril	1	3	1	7	1	1
5 azithromycin_Amlodipine	1	3	3	7	1	1
6 azithromycin_Metoprolol	1	2	3	7	2	1
7 azithromycin_Albuterol	1	2	1	3	3	1
8 azithromycin_Omeprazole	1	2	1	1	2	1
9 azithromycin_Losartan	1	2	1	7	2	1
10 azithromycin_Gabapentin	1	2	1	7	2	1
11 azithromycin_Hydrochlorothiazide	1	1	1	7	1	1
12 azithromycin_Sertraline	4	3	1	3	3	3
13 azithromycin_Simvastatin	4	4	3	3	5	3
14 azithromycin_Montelukast	1	2	1	7	2	1
15 azithromycin_Escitalopram	4	2	3	4	7	4
16 azithromycin_Acetaminophen	1	1	1	1	1	1
17 azithromycin_Hydrocodone	1	2	3	7	1	1
18 azithromycin_Rosuvastatin	1	3	3	1	3	1
19 azithromycin_Bupropion	1	1	3	1	7	1
20 azithromycin_Furosemide	1	2	1	1	2	1
21 azithromycin_Pantoprazole	1	2	1	1	1	1
22 azithromycin_Trazodone	4	2	3	3	7	3
24 azithromycin_Amphetamine	1	3	1	7	3	1
25 azithromycin_Fluticasone	1	2	1	3	1	1
26 azithromycin_Tamsulosin	1	2	1	7	1	1
27 azithromycin_Fluoxetine	4	3	3	7	3	3
28 azithromycin_Carvedilol	1	2	3	7	3	1
29 azithromycin_Duloxetine	1	3	3	1	1	1
30 azithromycin_Meloxicam	1	3	1	7	3	1
31 azithromycin_Clopidogrel	1	3	3	7	3	1
32 azithromycin_Prednisone	1	2	3	1	1	1
33 azithromycin_Citalopram	4	3	3	4	7	4
34 azithromycin_Insulin Glargine	1	2	1	1	3	1
35 azithromycin_Potassium Chloride	1	2	1	1	1	1
36 azithromycin_Pravastatin	1	2	1	7	3	1
37 azithromycin_Tramadol	1	3	3	3	3	3
38 azithromycin_Aspirin	1	2	1	1	1	1
39 azithromycin_Alprazolam	1	3	3	1	1	1
40 azithromycin_Ibuprofen	1	2	1	1	1	1
41 azithromycin_Cyclobenzaprine	1	3	3	1	1	1
42 azithromycin_Amoxicillin	1	2	1	1	2	2
43 azithromycin_Methylphenidate	1	1	3	1	3	1
44 azithromycin_Allopurinol	1	3	1	1	1	1
45 azithromycin_Venlafaxine	1	2	3	3	7	3
46 azithromycin_Clonazepam	1	2	3	7	1	1
47 azithromycin_Ethinyl Estradiol	1	3	1	3	3	3
48 azithromycin_ Norethindrone	1	1	1	2	3	1
49 azithromycin_Ergocalciferol	1	1	1	1	1	1
50 azithromycin_Zolpidem	1	3	3	7	1	1
51 azithromycin_Apixaban	1	3	3	1	2	1
52 azithromycin_Glipizide	1	3	1	7	3	1

## Sheet: Micro_Sens_Spec coded
	Micormedix	BingAI	ChatGPT3.5	ChatGPT4	Bard experiment
1 empagliflozin_atorvastatin	1	1	3	1	3
2 empagliflozin_Levothyroxine	1	3	3	1	3			Program	TP	FN	TN	FP	Sensitivity	Specificity	PPV	NPV	Accuracy
3 empagliflozin_Metformin	1	3	3	1	1			Microsoft BingAI (N=255)	41	6	160	48	0.87234	0.769231	0.460674	0.963855	0.788235
4 empagliflozin_Lisinopril	3	3	3	1	3			Microsoft BingAI (N=180)	41	2	89	48	0.953488	0.649635	0.460674	0.978022	0.722222
5 empagliflozin_Amlodipine	1	3	3	1	3			ChatGPT3.5 (N=255)	42	4	78	130	0.913043	0.375	0.244186	0.95122	0.472441
6 empagliflozin_Metoprolol	3	3	3	1	3			ChatGPT3.5 (N=254)	42	5	77	130	0.893617	0.371981	0.244186	0.939024	0.468504
7 empagliflozin_Albuterol	1	3	1	1	3			ChatGPT4 (255)	43	4	108	100	0.914894	0.519231	0.300699	0.964286	0.592157
8 empagliflozin_Omeprazole	1	1	3	1	1			Bard (255)	39	8	116	92	0.829787	0.557692	0.29771	0.935484	0.607843
9 empagliflozin_Losartan	1	3	3	1	3			Bard (240)	39	1	108	92	0.975	0.54	0.29771	0.990826	0.6125
10 empagliflozin_Gabapentin	1	1	3	1	1
11 empagliflozin_Hydrochlorothiazide	3	3	3	1	3
12 empagliflozin_Sertraline	1	3	3	1	1
13 empagliflozin_Simvastatin	1	1	3	1	1
14 empagliflozin_Montelukast	1	1	1	1	1
15 empagliflozin_Escitalopram	1		3	1	1
16 empagliflozin_Acetaminophen	1	1	1	1	1
17 empagliflozin_Hydrocodone	1	1	3	1	1
18 empagliflozin_Rosuvastatin	1	1	3	1	1
19 empagliflozin_Bupropion	1	1	3	1	1
20 empagliflozin_Furosemide	3	3	3	3	3
21 empagliflozin_Pantoprazole	1	1	1	1	1
22 empagliflozin_Trazodone	1		3	3	3
24 empagliflozin_Amphetamine	1		3	1	1
25 empagliflozin_Fluticasone	1		3	1	3
26 empagliflozin_Tamsulosin	1	3	3	1	3
27 empagliflozin_Fluoxetine	1	1	3	3	3
28 empagliflozin_Carvedilol	3	3	3	3	3
29 empagliflozin_Duloxetine	1		3	3	3
30 empagliflozin_Meloxicam	1	3	3	1	3
31 empagliflozin_Clopidogrel	1	1	3	1	3
32 empagliflozin_Prednisone	1	3	3	3	3
33 empagliflozin_Citalopram	1	3	3	3	3
34 empagliflozin_Insulin Glargine	3	3	1	3	3
35 empagliflozin_Potassium Chloride	1	1	3	1	3
36 empagliflozin_Pravastatin	1		1	1	1
37 empagliflozin_Tramadol	1		3	3	1
38 empagliflozin_Aspirin	1	1	1	1	1
39 empagliflozin_Alprazolam	1		3	3	1
40 empagliflozin_Ibuprofen	1	1	3	3	3
41 empagliflozin_Cyclobenzaprine	1		3	3	1
42 empagliflozin_Amoxicillin	1	1	1	1	1
43 empagliflozin_Methylphenidate	1		1	1	1
44 empagliflozin_Allopurinol	1	1	3	1	1
45 empagliflozin_Venlafaxine	1		3	3	1
46 empagliflozin_Clonazepam	1		1	1	1
47 empagliflozin_Ethinyl Estradiol	1	1	1	1	1
48 empagliflozin_ Norethindrone	1		1	1
49 empagliflozin_Ergocalciferol	1	1	1	1	1
50 empagliflozin_Zolpidem	1		1	1	1
51 empagliflozin_Apixaban	1	1	3	1	1
52 empagliflozin_Glipizide	3	3	3	3	3
1 dapagliflozin_atorvastatin	1	1	3	1	1
2 dapagliflozin_Levothyroxine	1	3	1	1	3
3 dapagliflozin_Metformin	1	3	1	1	1
4 dapagliflozin_Lisinopril	3	3	3	3	3
5 dapagliflozin_Amlodipine	1	3	1	1	3
6 dapagliflozin_Metoprolol	3	3	1	3	3
7 dapagliflozin_Albuterol	1	3	1	1
8 dapagliflozin_Omeprazole	1	1	1	1	1
9 dapagliflozin_Losartan	1	3	1	3	3
10 dapagliflozin_Gabapentin	1	1	1	1	1
11 dapagliflozin_Hydrochlorothiazide	3	3	3	3	3
12 dapagliflozin_Sertraline	1	3	1	3	1
13 dapagliflozin_Simvastatin	1	1	3	1	1
14 dapagliflozin_Montelukast	1	1	1	1	3
15 dapagliflozin_Escitalopram	1		3	3	1
16 dapagliflozin_Acetaminophen	1	1	1	1	1
17 dapagliflozin_Hydrocodone	1			3	1
18 dapagliflozin_Rosuvastatin	1	1	3	1	1
19 dapagliflozin_Bupropion	1	1	3	3	3
20 dapagliflozin_Furosemide	3	3	3	3	3
21 dapagliflozin_Pantoprazole	1	1	1	1	1
22 dapagliflozin_Trazodone	1		1	3	1
24 dapagliflozin_Amphetamine	1	3	3	3	1
25 dapagliflozin_Fluticasone	1		3	1	3
26 dapagliflozin_Tamsulosin	1	3	1	3	3
27 dapagliflozin_Fluoxetine	1		3	3	3
28 dapagliflozin_Carvedilol	3	3	3	3	3
29 dapagliflozin_Duloxetine	1		3	3	3
30 dapagliflozin_Meloxicam	1		3	3	1
31 dapagliflozin_Clopidogrel	1	1	1	3	3
32 dapagliflozin_Prednisone	1	3	3	3	3
33 dapagliflozin_Citalopram	1	1	3	3	3
34 dapagliflozin_Insulin Glargine	3	3	1	3	3
35 dapagliflozin_Potassium Chloride	1	1	1	3	3
36 dapagliflozin_Pravastatin	1	1	1	1
37 dapagliflozin_Tramadol	1		3	3	3
38 dapagliflozin_Aspirin	1	1	1	1	1
39 dapagliflozin_Alprazolam	1		1	3	1
40 dapagliflozin_Ibuprofen	1	1	3	3	3
41 dapagliflozin_Cyclobenzaprine	1		1	1	1
42 dapagliflozin_Amoxicillin	1	3	1	1	1
43 dapagliflozin_Methylphenidate	1	1	3	1	3
44 dapagliflozin_Allopurinol	1		3	3	1
45 dapagliflozin_Venlafaxine	1		1	3	3
46 dapagliflozin_Clonazepam	1		1	1	1
47 dapagliflozin_Ethinyl Estradiol	1	3	3	1	3
48 dapagliflozin_ Norethindrone	1		3	1	3
49 dapagliflozin_Ergocalciferol	1		1	1	1
50 dapagliflozin_Zolpidem	1	1	1	3	1
51 dapagliflozin_Apixaban	1	1	3	1	1
52 dapagliflozin_Glipizide	1	3	3	3	3
1 canagliflozin_atorvastatin	1		3	1	3
2 canagliflozin_Levothyroxine	1	3	3	1	3
3 canagliflozin_Metformin	1	3	3	3	1
4 canagliflozin_Lisinopril	3	3	3	3	3
5 canagliflozin_Amlodipine	1	3	3	3	3
6 canagliflozin_Metoprolol	3	3	3	3	3
7 canagliflozin_Albuterol	1	1	1	1	1
8 canagliflozin_Omeprazole	1	1	1	1	3
9 canagliflozin_Losartan	1	3	3	3	3
10 canagliflozin_Gabapentin	1	1	1	3	3
11 canagliflozin_Hydrochlorothiazide	3	1	3	3	1
12 canagliflozin_Sertraline	1	3	3	3	1
13 canagliflozin_Simvastatin	1	1	3	3	1
14 canagliflozin_Montelukast	1	1	1	1	1
15 canagliflozin_Escitalopram	1		3	3	1
16 canagliflozin_Acetaminophen	1	1	1	1	1
17 canagliflozin_Hydrocodone	1		3	3	3
18 canagliflozin_Rosuvastatin	1	3	3	1	3
19 canagliflozin_Bupropion	1		3	3	1
20 canagliflozin_Furosemide	3	3	3	3	3
21 canagliflozin_Pantoprazole	1		1	1	1
22 canagliflozin_Trazodone	1	1	3	3	3
24 canagliflozin_Amphetamine	1	1	3	3	1
25 canagliflozin_Fluticasone	1	1	3	1	3
26 canagliflozin_Tamsulosin	1		3	3	3
27 canagliflozin_Fluoxetine	1	3	3	3	3
28 canagliflozin_Carvedilol	3	3	3	3	3
29 canagliflozin_Duloxetine	1	1	3	3	3
30 canagliflozin_Meloxicam	1		3	3	3
31 canagliflozin_Clopidogrel	1		3	3	3
32 canagliflozin_Prednisone	1		1	3	3
33 canagliflozin_Citalopram	1	3	3	3	3
34 canagliflozin_Insulin Glargine	3	3	3	3	3
35 canagliflozin_Potassium Chloride	1	1	3	3	3
36 canagliflozin_Pravastatin	1		3	1	1
37 canagliflozin_Tramadol	1		3	3	3
38 canagliflozin_Aspirin	1	1	3	3	1
39 canagliflozin_Alprazolam	1		1	3	3
40 canagliflozin_Ibuprofen	1	1	3	3	3
41 canagliflozin_Cyclobenzaprine	1	1	3	3	1
42 canagliflozin_Amoxicillin	1		1	1	1
43 canagliflozin_Methylphenidate	1	1	3	3	1
44 canagliflozin_Allopurinol	1	1	3	3	3
45 canagliflozin_Venlafaxine	1		3	3	1
46 canagliflozin_Clonazepam	1		3	3	1
47 canagliflozin_Ethinyl Estradiol	1	3	3	3	1
48 canagliflozin_ Norethindrone	1	3	3	1
49 canagliflozin_Ergocalciferol	1		1	1	1
50 canagliflozin_Zolpidem	1	1	1	3	3
51 canagliflozin_Apixaban	1		3	3	3
52 canagliflozin_Glipizide	1	1	3	3	3
1 clarithro_atorvastatin	3	3	3	3	3
2 clarithromycin_Levothyroxine	1	1	3	1	1
3 clarithromycin_Metformin	1	3	3	3	3
4 clarithromycin_Lisinopril	1		3	1	3
5 clarithromycin_Amlodipine	3	3	3	3	3
6 clarithromycin_Metoprolol	1		3	3
7 clarithromycin_Albuterol	1	3	3	1	3
8 clarithromycin_Omeprazole	1	1	3	3	1
9 clarithromycin_Losartan	3		3	3	3
10 clarithromycin_Gabapentin	1	1	3	1	1
11 clarithromycin_Hydrochlorothiazide	1	1	3	1	3
12 clarithromycin_Sertraline	3	3	3	3
13 clarithromycin_Simvastatin	3	3	3	3	3
14 clarithromycin_Montelukast	1	1	3	3	3
15 clarithromycin_Escitalopram	3	3	3	3	3
16 clarithromycin_Acetaminophen	1	1	1	1	1
17 clarithromycin_Hydrocodone	1	3	3	3
18 clarithromycin_Rosuvastatin	1	1	3	3	3
19 clarithromycin_Bupropion	3		3	3	3
20 clarithromycin_Furosemide	1		3	3	3
21 clarithromycin_Pantoprazole	1	3	3	3	3
22 clarithromycin_Trazodone	3	3	3	3
24 clarithromycin_Amphetamine	1		3	3	3
25 clarithromycin_Fluticasone	3	3	3	3	3
26 clarithromycin_Tamsulosin	3	3	3	3	3
27 clarithromycin_Fluoxetine	3	3	3	3	3
28 clarithromycin_Carvedilol	1	3	3	3	3
29 clarithromycin_Duloxetine	1	1	3	3	1
30 clarithromycin_Meloxicam	1		3	3	3
31 clarithromycin_Clopidogrel	1	3	3	3	3
32 clarithromycin_Prednisone	3	3	3	3	3
33 clarithromycin_Citalopram	3	3	3	3
34 clarithromycin_Insulin Glargine	1	3	3	1	3
35 clarithromycin_Potassium Chloride	1		3	1	1
36 clarithromycin_Pravastatin	3	3	3	3	3
37 clarithromycin_Tramadol	3	3	3	3	3
38 clarithromycin_Aspirin	1	1	3	3	1
39 clarithromycin_Alprazolam	3	3	3	3	3
40 clarithromycin_Ibuprofen	1	1	3	1	1
41 clarithromycin_Cyclobenzaprine	3		3	3	3
42 clarithromycin_Amoxicillin	1	1	3	1	1
43 clarithromycin_Methylphenidate	1		3	3	3
44 clarithromycin_Allopurinol	1		3	3	3
45 clarithromycin_Venlafaxine	3	3	3	3
46 clarithromycin_Clonazepam	3	3	3	3	3
47 clarithromycin_Ethinyl Estradiol	1	3	3	3	3
48 clarithromycin_ Norethindrone	1	3	3	3	3
49 clarithromycin_Ergocalciferol	1	1	3	1	1
50 clarithromycin_Zolpidem	3	1	3	3	3
51 clarithromycin_Apixaban	1	3	3	3	3
52 clarithromycin_Glipizide	3	3	3	3	3
1 azithromycin_atorvastatin	3	3	3	3	3
2 azithromycin_Levothyroxine	1	1	3	1	1
3 azithromycin_Metformin	1	3	1	1	1
4 azithromycin_Lisinopril	1		3	1	1
5 azithromycin_Amlodipine	1		3	3	1
6 azithromycin_Metoprolol	1		1	3	1
7 azithromycin_Albuterol	1	3	1	1	3
8 azithromycin_Omeprazole	1	1	1	1	1
9 azithromycin_Losartan	1		1	1	1
10 azithromycin_Gabapentin	1		1	1	1
11 azithromycin_Hydrochlorothiazide	1		1	1	1
12 azithromycin_Sertraline	3	3	3	1	3
13 azithromycin_Simvastatin	3	3	3	3	3
14 azithromycin_Montelukast	1		1	1	1
15 azithromycin_Escitalopram	3	3	1	3
16 azithromycin_Acetaminophen	1	1	1	1	1
17 azithromycin_Hydrocodone	1		1	3	1
18 azithromycin_Rosuvastatin	1	1	3	3	3
19 azithromycin_Bupropion	1	1	1	3
20 azithromycin_Furosemide	1	1	1	1	1
21 azithromycin_Pantoprazole	1	1	1	1	1
22 azithromycin_Trazodone	3	3	1	3
24 azithromycin_Amphetamine	1		3	1	3
25 azithromycin_Fluticasone	1	3	1	1	1
26 azithromycin_Tamsulosin	1		1	1	1
27 azithromycin_Fluoxetine	3		3	3	3
28 azithromycin_Carvedilol	1		1	3	3
29 azithromycin_Duloxetine	1	1	3	3	1
30 azithromycin_Meloxicam	1		3	1	3
31 azithromycin_Clopidogrel	1		3	3	3
32 azithromycin_Prednisone	1	1	1	3	1
33 azithromycin_Citalopram	3	3	3	3
34 azithromycin_Insulin Glargine	1	1	1	1	3
35 azithromycin_Potassium Chloride	1	1	1	1	1
36 azithromycin_Pravastatin	1		1	1	3
37 azithromycin_Tramadol	1	3	3	3	3
38 azithromycin_Aspirin	1	1	1	1	1
39 azithromycin_Alprazolam	1	1	3	3	1
40 azithromycin_Ibuprofen	1	1	1	1	1
41 azithromycin_Cyclobenzaprine	1	1	3	3	1
42 azithromycin_Amoxicillin	1	1	1	1	1
43 azithromycin_Methylphenidate	1	1	1	3	3
44 azithromycin_Allopurinol	1	1	3	1	1
45 azithromycin_Venlafaxine	1	3	1	3
46 azithromycin_Clonazepam	1		1	3	1
47 azithromycin_Ethinyl Estradiol	1	3	3	1	3
48 azithromycin_ Norethindrone	1	1	1	1	3
49 azithromycin_Ergocalciferol	1	1	1	1	1
50 azithromycin_Zolpidem	1		3	3	1
51 azithromycin_Apixaban	1	1	3	3	1
52 azithromycin_Glipizide	1		3	1	3

## Sheet: Drugs.com_Sen_spe coded
	Drugs.com	BingAI	ChatGPT3.5	ChatGPT4	Bard experiment
1 empagliflozin_atorvastatin	1	1	3	1	3
2 empagliflozin_Levothyroxine	3	3	3	1	3			Program	TP	FN	TN	FP	Sensitivity	Specificity	PPV	NPV	Accuracy
3 empagliflozin_Metformin	1	3	3	1	1			Microsoft BingAI (N=255)	70	9	157	19	0.886076	0.892045	0.786517	0.945783	0.890196
4 empagliflozin_Lisinopril	3	3	3	1	3			Microsoft BingAI (N=180)	70	4	87	19	0.945946	0.820755	0.786517	0.956044	0.872222
5 empagliflozin_Amlodipine	3	3	3	1	3			ChatGPT3.5 (N=255)	65	14	69	107	0.822785	0.392045	0.377907	0.831325	0.52549
6 empagliflozin_Metoprolol	3	3	3	1	3			ChatGPT3.5 (N=254)	65	14	68	107	0.822785	0.388571	0.377907	0.829268	0.523622
7 empagliflozin_Albuterol	3	3	1	1	3			ChatGPT4 (255)	59	20	92	84	0.746835	0.522727	0.412587	0.821429	0.592157
8 empagliflozin_Omeprazole	1	1	3	1	1			Bard (255)	65	14	110	66	0.822785	0.625	0.496183	0.887097	0.686275
9 empagliflozin_Losartan	3	3	3	1	3			Bard (240)	65	3	106	66	0.955882	0.616279	0.496183	0.972477	0.7125
10 empagliflozin_Gabapentin	1	1	3	1	1
11 empagliflozin_Hydrochlorothiazide	3	3	3	1	3
12 empagliflozin_Sertraline	1	3	3	1	1
13 empagliflozin_Simvastatin	1	1	3	1	1
14 empagliflozin_Montelukast	1	1	1	1	1
15 empagliflozin_Escitalopram	1		3	1	1
16 empagliflozin_Acetaminophen	1	1	1	1	1
17 empagliflozin_Hydrocodone	1	1	3	1	1
18 empagliflozin_Rosuvastatin	1	1	3	1	1
19 empagliflozin_Bupropion	1	1	3	1	1
20 empagliflozin_Furosemide	3	3	3	3	3
21 empagliflozin_Pantoprazole	1	1	1	1	1
22 empagliflozin_Trazodone	1		3	3	3
24 empagliflozin_Amphetamine	1		3	1	1
25 empagliflozin_Fluticasone	1		3	1	3
26 empagliflozin_Tamsulosin	3	3	3	1	3
27 empagliflozin_Fluoxetine	1	1	3	3	3
28 empagliflozin_Carvedilol	3	3	3	3	3
29 empagliflozin_Duloxetine	1		3	3	3
30 empagliflozin_Meloxicam	1	3	3	1	3
31 empagliflozin_Clopidogrel	1	1	3	1	3
32 empagliflozin_Prednisone	3	3	3	3	3
33 empagliflozin_Citalopram	1	3	3	3	3
34 empagliflozin_Insulin Glargine	3	3	1	3	3
35 empagliflozin_Potassium Chloride	1	1	3	1	3
36 empagliflozin_Pravastatin	1		1	1	1
37 empagliflozin_Tramadol	1		3	3	1
38 empagliflozin_Aspirin	1	1	1	1	1
39 empagliflozin_Alprazolam	1		3	3	1
40 empagliflozin_Ibuprofen	1	1	3	3	3
41 empagliflozin_Cyclobenzaprine	1		3	3	1
42 empagliflozin_Amoxicillin	1	1	1	1	1
43 empagliflozin_Methylphenidate	1		1	1	1
44 empagliflozin_Allopurinol	1	1	3	1	1
45 empagliflozin_Venlafaxine	1		3	3	1
46 empagliflozin_Clonazepam	1		1	1	1
47 empagliflozin_Ethinyl Estradiol	3	1	1	1	1
48 empagliflozin_ Norethindrone	3		1	1
49 empagliflozin_Ergocalciferol	1	1	1	1	1
50 empagliflozin_Zolpidem	1		1	1	1
51 empagliflozin_Apixaban	1	1	3	1	1
52 empagliflozin_Glipizide	3	3	3	3	3
1 dapagliflozin_atorvastatin	1	1	3	1	1
2 dapagliflozin_Levothyroxine	3	3	1	1	3
3 dapagliflozin_Metformin	1	3	1	1	1
4 dapagliflozin_Lisinopril	3	3	3	3	3
5 dapagliflozin_Amlodipine	3	3	1	1	3
6 dapagliflozin_Metoprolol	3	3	1	3	3
7 dapagliflozin_Albuterol	1	3	1	1
8 dapagliflozin_Omeprazole	1	1	1	1	1
9 dapagliflozin_Losartan	3	3	1	3	3
10 dapagliflozin_Gabapentin	1	1	1	1	1
11 dapagliflozin_Hydrochlorothiazide	3	3	3	3	3
12 dapagliflozin_Sertraline	1	3	1	3	1
13 dapagliflozin_Simvastatin	1	1	3	1	1
14 dapagliflozin_Montelukast	1	1	1	1	3
15 dapagliflozin_Escitalopram	1		3	3	1
16 dapagliflozin_Acetaminophen	1	1	1	1	1
17 dapagliflozin_Hydrocodone	1			3	1
18 dapagliflozin_Rosuvastatin	1	1	3	1	1
19 dapagliflozin_Bupropion	1	1	3	3	3
20 dapagliflozin_Furosemide	3	3	3	3	3
21 dapagliflozin_Pantoprazole	1	1	1	1	1
22 dapagliflozin_Trazodone	1		1	3	1
24 dapagliflozin_Amphetamine	1	3	3	3	1
25 dapagliflozin_Fluticasone	1		3	1	3
26 dapagliflozin_Tamsulosin	3	3	1	3	3
27 dapagliflozin_Fluoxetine	1		3	3	3
28 dapagliflozin_Carvedilol	3	3	3	3	3
29 dapagliflozin_Duloxetine	1		3	3	3
30 dapagliflozin_Meloxicam	1		3	3	1
31 dapagliflozin_Clopidogrel	1	1	1	3	3
32 dapagliflozin_Prednisone	3	3	3	3	3
33 dapagliflozin_Citalopram	1	1	3	3	3
34 dapagliflozin_Insulin Glargine	3	3	1	3	3
35 dapagliflozin_Potassium Chloride	1	1	1	3	3
36 dapagliflozin_Pravastatin	1	1	1	1
37 dapagliflozin_Tramadol	1		3	3	3
38 dapagliflozin_Aspirin	1	1	1	1	1
39 dapagliflozin_Alprazolam	1		1	3	1
40 dapagliflozin_Ibuprofen	1	1	3	3	3
41 dapagliflozin_Cyclobenzaprine	1		1	1	1
42 dapagliflozin_Amoxicillin	1	3	1	1	1
43 dapagliflozin_Methylphenidate	1	1	3	1	3
44 dapagliflozin_Allopurinol	1		3	3	1
45 dapagliflozin_Venlafaxine	1		1	3	3
46 dapagliflozin_Clonazepam	1		1	1	1
47 dapagliflozin_Ethinyl Estradiol	3	3	3	1	3
48 dapagliflozin_ Norethindrone	3		3	1	3
49 dapagliflozin_Ergocalciferol	1		1	1	1
50 dapagliflozin_Zolpidem	1	1	1	3	1
51 dapagliflozin_Apixaban	1	1	3	1	1
52 dapagliflozin_Glipizide	3	3	3	3	3
1 canagliflozin_atorvastatin	1		3	1	3
2 canagliflozin_Levothyroxine	3	3	3	1	3
3 canagliflozin_Metformin	1	3	3	3	1
4 canagliflozin_Lisinopril	3	3	3	3	3
5 canagliflozin_Amlodipine	3	3	3	3	3
6 canagliflozin_Metoprolol	3	3	3	3	3
7 canagliflozin_Albuterol	1	1	1	1	1
8 canagliflozin_Omeprazole	1	1	1	1	3
9 canagliflozin_Losartan	3	3	3	3	3
10 canagliflozin_Gabapentin	1	1	1	3	3
11 canagliflozin_Hydrochlorothiazide	3	1	3	3	1
12 canagliflozin_Sertraline	1	3	3	3	1
13 canagliflozin_Simvastatin	1	1	3	3	1
14 canagliflozin_Montelukast	1	1	1	1	1
15 canagliflozin_Escitalopram	1		3	3	1
16 canagliflozin_Acetaminophen	1	1	1	1	1
17 canagliflozin_Hydrocodone	1		3	3	3
18 canagliflozin_Rosuvastatin	1	3	3	1	3
19 canagliflozin_Bupropion	1		3	3	1
20 canagliflozin_Furosemide	3	3	3	3	3
21 canagliflozin_Pantoprazole	1		1	1	1
22 canagliflozin_Trazodone	1	1	3	3	3
24 canagliflozin_Amphetamine	1	1	3	3	1
25 canagliflozin_Fluticasone	1	1	3	1	3
26 canagliflozin_Tamsulosin	3		3	3	3
27 canagliflozin_Fluoxetine	1	3	3	3	3
28 canagliflozin_Carvedilol	3	3	3	3	3
29 canagliflozin_Duloxetine	1	1	3	3	3
30 canagliflozin_Meloxicam	1		3	3	3
31 canagliflozin_Clopidogrel	1		3	3	3
32 canagliflozin_Prednisone	3		1	3	3
33 canagliflozin_Citalopram	1	3	3	3	3
34 canagliflozin_Insulin Glargine	3	3	3	3	3
35 canagliflozin_Potassium Chloride	1	1	3	3	3
36 canagliflozin_Pravastatin	1		3	1	1
37 canagliflozin_Tramadol	1		3	3	3
38 canagliflozin_Aspirin	1	1	3	3	1
39 canagliflozin_Alprazolam	1		1	3	3
40 canagliflozin_Ibuprofen	1	1	3	3	3
41 canagliflozin_Cyclobenzaprine	1	1	3	3	1
42 canagliflozin_Amoxicillin	1		1	1	1
43 canagliflozin_Methylphenidate	1	1	3	3	1
44 canagliflozin_Allopurinol	1	1	3	3	3
45 canagliflozin_Venlafaxine	1		3	3	1
46 canagliflozin_Clonazepam	1		3	3	1
47 canagliflozin_Ethinyl Estradiol	3	3	3	3	1
48 canagliflozin_ Norethindrone	3	3	3	1
49 canagliflozin_Ergocalciferol	1		1	1	1
50 canagliflozin_Zolpidem	1	1	1	3	3
51 canagliflozin_Apixaban	1		3	3	3
52 canagliflozin_Glipizide	3	1	3	3	3
1 clarithro_atorvastatin	3	3	3	3	3
2 clarithromycin_Levothyroxine	1	1	3	1	1
3 clarithromycin_Metformin	3	3	3	3	3
4 clarithromycin_Lisinopril	1		3	1	3
5 clarithromycin_Amlodipine	3	3	3	3	3
6 clarithromycin_Metoprolol	1		3	3
7 clarithromycin_Albuterol	3	3	3	1	3
8 clarithromycin_Omeprazole	1	1	3	3	1
9 clarithromycin_Losartan	1		3	3	3
10 clarithromycin_Gabapentin	1	1	3	1	1
11 clarithromycin_Hydrochlorothiazide	1	1	3	1	3
12 clarithromycin_Sertraline	3	3	3	3
13 clarithromycin_Simvastatin	3	3	3	3	3
14 clarithromycin_Montelukast	1	1	3	3	3
15 clarithromycin_Escitalopram	3	3	3	3	3
16 clarithromycin_Acetaminophen	1	1	1	1	1
17 clarithromycin_Hydrocodone	3	3	3	3
18 clarithromycin_Rosuvastatin	1	1	3	3	3
19 clarithromycin_Bupropion	1		3	3	3
20 clarithromycin_Furosemide	1		3	3	3
21 clarithromycin_Pantoprazole	1	3	3	3	3
22 clarithromycin_Trazodone	3	3	3	3
24 clarithromycin_Amphetamine	1		3	3	3
25 clarithromycin_Fluticasone	3	3	3	3	3
26 clarithromycin_Tamsulosin	3	3	3	3	3
27 clarithromycin_Fluoxetine	3	3	3	3	3
28 clarithromycin_Carvedilol	1	3	3	3	3
29 clarithromycin_Duloxetine	1	1	3	3	1
30 clarithromycin_Meloxicam	1		3	3	3
31 clarithromycin_Clopidogrel	3	3	3	3	3
32 clarithromycin_Prednisone	3	3	3	3	3
33 clarithromycin_Citalopram	3	3	3	3
34 clarithromycin_Insulin Glargine	3	3	3	1	3
35 clarithromycin_Potassium Chloride	1		3	1	1
36 clarithromycin_Pravastatin	3	3	3	3	3
37 clarithromycin_Tramadol	3	3	3	3	3
38 clarithromycin_Aspirin	1	1	3	3	1
39 clarithromycin_Alprazolam	3	3	3	3	3
40 clarithromycin_Ibuprofen	1	1	3	1	1
41 clarithromycin_Cyclobenzaprine	1		3	3	3
42 clarithromycin_Amoxicillin	1	1	3	1	1
43 clarithromycin_Methylphenidate	1		3	3	3
44 clarithromycin_Allopurinol	1		3	3	3
45 clarithromycin_Venlafaxine	3	3	3	3
46 clarithromycin_Clonazepam	3	3	3	3	3
47 clarithromycin_Ethinyl Estradiol	3	3	3	3	3
48 clarithromycin_ Norethindrone	3	3	3	3	3
49 clarithromycin_Ergocalciferol	1	1	3	1	1
50 clarithromycin_Zolpidem	3	1	3	3	3
51 clarithromycin_Apixaban	3	3	3	3	3
52 clarithromycin_Glipizide	3	3	3	3	3
1 azithromycin_atorvastatin	3	3	3	3	3
2 azithromycin_Levothyroxine	1	1	3	1	1
3 azithromycin_Metformin	1	3	1	1	1
4 azithromycin_Lisinopril	1		3	1	1
5 azithromycin_Amlodipine	1		3	3	1
6 azithromycin_Metoprolol	1		1	3	1
7 azithromycin_Albuterol	1	3	1	1	3
8 azithromycin_Omeprazole	1	1	1	1	1
9 azithromycin_Losartan	1		1	1	1
10 azithromycin_Gabapentin	1		1	1	1
11 azithromycin_Hydrochlorothiazide	1		1	1	1
12 azithromycin_Sertraline	3	3	3	1	3
13 azithromycin_Simvastatin	3	3	3	3	3
14 azithromycin_Montelukast	1		1	1	1
15 azithromycin_Escitalopram	3	3	1	3
16 azithromycin_Acetaminophen	1	1	1	1	1
17 azithromycin_Hydrocodone	1		1	3	1
18 azithromycin_Rosuvastatin	1	1	3	3	3
19 azithromycin_Bupropion	1	1	1	3
20 azithromycin_Furosemide	1	1	1	1	1
21 azithromycin_Pantoprazole	1	1	1	1	1
22 azithromycin_Trazodone	3	3	1	3
24 azithromycin_Amphetamine	1		3	1	3
25 azithromycin_Fluticasone	1	3	1	1	1
26 azithromycin_Tamsulosin	1		1	1	1
27 azithromycin_Fluoxetine	3		3	3	3
28 azithromycin_Carvedilol	1		1	3	3
29 azithromycin_Duloxetine	1	1	3	3	1
30 azithromycin_Meloxicam	1		3	1	3
31 azithromycin_Clopidogrel	1		3	3	3
32 azithromycin_Prednisone	1	1	1	3	1
33 azithromycin_Citalopram	3	3	3	3
34 azithromycin_Insulin Glargine	1	1	1	1	3
35 azithromycin_Potassium Chloride	1	1	1	1	1
36 azithromycin_Pravastatin	1		1	1	3
37 azithromycin_Tramadol	3	3	3	3	3
38 azithromycin_Aspirin	1	1	1	1	1
39 azithromycin_Alprazolam	1	1	3	3	1
40 azithromycin_Ibuprofen	1	1	1	1	1
41 azithromycin_Cyclobenzaprine	1	1	3	3	1
42 azithromycin_Amoxicillin	1	1	1	1	1
43 azithromycin_Methylphenidate	1	1	1	3	3
44 azithromycin_Allopurinol	1	1	3	1	1
45 azithromycin_Venlafaxine	3	3	1	3
46 azithromycin_Clonazepam	1		1	3	1
47 azithromycin_Ethinyl Estradiol	3	3	3	1	3
48 azithromycin_ Norethindrone	1	1	1	1	3
49 azithromycin_Ergocalciferol	1	1	1	1	1
50 azithromycin_Zolpidem	1		3	3	1
51 azithromycin_Apixaban	1	1	3	3	1
52 azithromycin_Glipizide	1		3	1	3
